1 **Adaptation of plasticity to predicted climates in Australian rainbowfishes**  
2 **(*Melanotaenia*) across climatically defined bioregions**

3

4 Jonathan Sandoval-Castillo<sup>1</sup>, Katie Gates<sup>1</sup>, Chris J. Brauer<sup>1</sup>, Steve Smith<sup>1,2</sup>, Louis  
5 Bernatchez<sup>3</sup> and Luciano B. Beheregaray<sup>1\*</sup>

6

7 <sup>1</sup> Molecular Ecology Lab, Flinders University, Bedford Park, 5042, South Australia, Australia

8 <sup>2</sup> Konrad Lorenz Institute of Ethology, University of Veterinary Medicine, Vienna, 1160,  
9 Austria

10 <sup>3</sup> Institut de Biologie Intégrative et des Systèmes, Université Laval Québec, Québec G1V  
11 0A6, Canada

12

13 \*Correspondence: [luciano.beheregaray@flinders.edu.au](mailto:luciano.beheregaray@flinders.edu.au)

14

15

16 **Running head:** *Adaptation of plasticity in climatic ecotypes*

17

18 **Keywords:** climatic variability hypothesis; climate change; comparative transcriptomics;  
19 ectotherms; ecological genomics; aquatic biodiversity; gene expression.

20

21

## 22 **Abstract**

23 Resilience to environmental stressors due to climate warming is influenced by local  
24 adaptations, including the capacity for plastic responses. The recent literature has focussed on  
25 genomic signatures of climatic adaptation, however little work has been done to address how  
26 plastic capacity may be influenced by biogeographic history and evolutionary processes. Here,  
27 we investigate phenotypic plasticity as a target of climatic selection, hypothesising that lineages  
28 that evolved under warmer climate will exhibit greater plastic adaptive resilience to thermal  
29 stress. This was tested using common garden experiments to compare gene expression  
30 regulation within and among a temperate, a subtropical and a desert ecotype of Australian  
31 rainbowfish. Individuals from each ecotype were subjected to contemporary and projected  
32 summer thermal conditions for 2070, and their global patterns of gene expression were  
33 characterized using liver transcriptomes. Critical thermal maximums were also determined for  
34 each ecotype to assess thermal tolerance. A comparative phylogenetic expression variance and  
35 evolution model framework was used to assess plastic and evolved changes in gene expression.  
36 Similar changes in both the direction and the magnitude of expressed genes were found within  
37 ecotypes. Although most expressed genes were identified in all ecotypes, 532 genes were  
38 identified as candidates subject to ecotype-specific directional selection. Twenty-three of those  
39 genes showed signal of adaptive (i.e. genetic-based) plastic response to future increases in  
40 temperature. Network analyses demonstrated centrality of these genes in thermal response  
41 pathways, along with several highly conserved hub genes thought to be integral for heat stress  
42 responses. The greatest adaptive resilience to warming was shown by the subtropical ecotype,  
43 followed by the desert and temperate ecotypes. Our findings indicate that vulnerability to  
44 climate change will be highly influenced by biogeographic factors, and we stress the need for  
45 integrative assessments of climatic adaptive traits for accurate estimations of population and  
46 ecosystem responses.

## 47 **Introduction**

48 Characterizing mechanisms underpinning variation in ecological adaptation can assist in  
49 identifying biogeographic patterns of vulnerability and resilience to environmental change.  
50 Climate change has promoted numerous range shifts and local extinctions due to exposure of  
51 populations to conditions outside their zones of tolerance (Grabherr, Gottfried, & Pauli, 2009;  
52 Parmesan et al., 1999; Thomas & Lennon, 1999; Wiens, 2016). However, it is expected that  
53 some populations will be able to persist *in situ* if they are not already living at the edge of their  
54 tolerance limits; or, if they are able to acclimatise or adapt outside their current range of  
55 tolerance (Catullo, Ferrier, & Hoffmann, 2015; Hoffmann & Sgro, 2011; Stillman, 2003;  
56 Sunday, Bates, & Dulvy, 2011, 2012). Species' distributions are strongly influenced by thermal  
57 conditions in their native climates; it is expected that tolerance ranges and vulnerability to  
58 change will also be influenced by biogeographic factors (Addo-Bediako, Chown, & Gaston,  
59 2000; Calosi, Bilton, Spicer, Votier, & Atfield, 2010; Cohet, Vouldibio, & David, 1980;  
60 Compton, Rijkenberg, Drent, & Piersma, 2007). Exploring how molecular mechanisms  
61 influence thermal resilience and, ultimately, the evolution of divergent thermal phenotypes, is  
62 an important step for inferring responses to a warming environment (Komoroske, Connon,  
63 Jeffries, & Fangué, 2015). While evidence suggests that plastic regulation of gene expression  
64 plays an important role in ecological adaptation, the effects of selection on plasticity are so far  
65 poorly understood and successfully untangling them is likely to require integrative approaches  
66 (Gilad, Oshlack, & Rifkin, 2006; Jin et al., 2001; McCairns & Bernatchez, 2012).

67

68 Plasticity can be described as a change in expressed phenotype as a function of the  
69 environment, and occurs through direct effects of the environment on allelic expression, as well  
70 as changes in interactions among loci (Nonaka, Svanbäck, Thibert-Plante, Englund, &  
71 Brännström, 2015; Scheiner, 1993). Here, we focus on plasticity as the ability or tendency of

72 an individual to up- or down-regulate genes in response to the environment. For many genes,  
73 this occurs primarily at the level of transcription, and a complexity of plastic responses (i.e.  
74 adaptive, maladaptive or neutral) have been observed in regard to individual fitness  
75 (Ghalambor, McKay, Carroll, & Reznick, 2007; Gibert, Debat, & Ghalambor, 2019; Marden,  
76 2008). For instance, plasticity can act as a buffer against environmental pressures, providing  
77 short-term advantage but potentially dampening the effects of natural selection (Ghalambor et  
78 al., 2007; Grenier, Barre, & Litrico, 2016). Plastic responses have also been found to increase  
79 the potential for colonisation of new areas and provide greater likelihood of adaptive radiation  
80 (Muschick, Barluenga, Salzburger, & Meyer, 2011; Pfennig et al., 2010; Wellband & Heath,  
81 2017; Wund, 2012). Plasticity itself can be a target of selection if genotypes differ in their  
82 sensitivity to environmental variation (Fusco & Minelli, 2010), including selection driving  
83 rapid adaptive evolution of genes exhibiting non-adaptive plasticity (Ghalambor et al., 2015).

84

85 In the context of climate, studies of gene expression can inform about the functional pathways  
86 relevant for persistence under a given condition, as well as the likely targets of selection  
87 (Komoroske et al., 2015; Reed, Schindler, & Waples, 2011). This is especially important where  
88 phenotypes of ecological relevance are not obvious, and may be difficult to distinguish using  
89 traditional approaches (Nevins & Potti, 2007; Nosil, 2012). While a variety of methods have  
90 been developed to detect evidence of ecological adaptation at the genomic level, relatively few  
91 studies have so far attempted to find signals of selection acting on gene expression. Challenges  
92 include controlling for the large range of internal and external environmental variables  
93 influencing expression (Conesa et al., 2016; De Wit et al., 2012), as well as the effects of  
94 genetic distance which are typically expected to account for much of the variation in  
95 transcription observed between lineages (Dunn, Luo, & Wu, 2013).

96 Climatically defined bioregions provide a scale at which environmental variation drives  
97 meaningful differences in evolutionary and ecological processes (Fine, 2015; Jetz & Fine,  
98 2012). The ability of populations to persist under climate warming is predicted to vary  
99 geographically (Aitken & Whitlock, 2013; Catullo et al., 2015; Ghalambor, Huey, Martin,  
100 Tewksbury, & Wang, 2006; Polato et al., 2018; Sorte, Jones, & Miller, 2011; Thomas et al.,  
101 2004), making climatic bioregions valuable systems for comparative studies of adaptation. For  
102 instance, the climatic variability hypothesis (CVH) predicts a positive relationship between  
103 breadth of thermal tolerance and the level of climatic variability experienced by organisms as  
104 latitude increases (Janzen, 1967). Studies of climate change impacts are increasingly seeking  
105 to integrate spatial modelling (e.g. climatic envelopes) to uncover associations between  
106 landscape features and evolutionary processes such as temperature adaptation (Araújo,  
107 Whittaker, Ladle, & Erhard, 2005; Cianfrani, Satizábal, & Randin, 2015; Summers, Bryan,  
108 Crossman, & Meyer, 2012). While a majority of species distribution models are primarily  
109 correlative, there has been an urgent call for an increase in mechanistic approaches for  
110 predicting species' responses to climate change (Bay et al., 2017; Cavaleri, Reed, Smith, &  
111 Wood, 2015; Comte & Olden, 2016; Evans, Merow, Record, McMahon, & Enquist, 2016;  
112 Mathewson et al., 2017). Mechanistic approaches have the advantage of explaining the  
113 underlying processes associated with observed trends, minimising the risk of flawed  
114 extrapolation (Dormann et al., 2012; Kearney & Porter, 2009). On a molecular scale, this is  
115 important for disentangling the respective effects of adaptation and phylogenetic signal, as well  
116 as the interactions between these two factors (Comte & Olden, 2016; Hoffmann, Chown, &  
117 Clusella-Trullas, 2013).

118

119 Freshwater ecosystems are of particular interest when studying the impacts of climate change  
120 due to their vulnerability. They are dependent on the interrelated influences of temperature and

121 precipitation, and their spatially fragmented and often linear nature reduces opportunities for  
122 organismal dispersal. Freshwater fishes represent an important component of vertebrate  
123 diversity and, as ectotherms, are especially vulnerable to thermal changes (Deutsch et al.,  
124 2008). The subjects of this study are Australian rainbowfishes of *Melanotaenia* (family  
125 *Melanotaeniidae*), a freshwater genus with historical origins in tropical southern New Guinea  
126 (McGuigan, Zhu, Allen, & Moritz, 2000). *Melanotaenia* spp. of the ‘australis’ clade (Unmack  
127 et al. 2013) provide an ideal model system to study climatic-driven adaptive evolution and to  
128 address predictions from the CVH for freshwater ecosystems. The clade contains a minimum  
129 of eight largely allopatric species that recently radiated into tropical, subtropical, desert and  
130 temperate regions of mainland Australia (Unmack et al. 2013). Species of this clade show  
131 adaptive phenotypic divergence due to selection linked to the hydrological environment  
132 (McGuigan, Chenoweth, & Blows, 2005; McGuigan, Franklin, Moritz, & Blows, 2003), as  
133 well as adaptive genomic divergence associated with hydroclimatic variation (Brauer, Unmack,  
134 Smith, Bernatchez, & Beheregaray, 2018; McGuigan et al., 2005; McGuigan et al., 2003) In  
135 terms of gene expression, common garden experiments in a subtropical ‘australis’ species (*M.*  
136 *duboulayi*) have tested the effect of 2070-projected summer temperatures on short-term (Smith,  
137 Bernatchez, & Beheregaray, 2013) and long-term (McCairns, Smith, Sasaki, Bernatchez, &  
138 Beheregaray, 2016) transcriptional responses. Both studies indicated a capacity for plastic  
139 response to future climates, and enabled identification of candidate genes for thermal  
140 adaptation (McCairns et al., 2016; Smith et al., 2013). In addition, the transgenerational  
141 experiment in *M. duboulayi* revealed pedigree-based evidence for heritability of observed  
142 plastic responses (McCairns et al., 2016).

143

144 Our work focuses on three closely related ‘australis’ species, *M. splendida tatei*, *M. fluviatilis*  
145 and *M. duboulayi*. Their ranges show a striking concordance with three major contemporary

146 climatic bioregions of the Australian continent (Fig. 1), suggesting that their evolution has been  
147 influenced by selective pressures associated with climatic regimes. For this reason, we refer to  
148 them herein as climatic ‘ecotypes’, *sensu* Engelhard, Ellis, Payne, ter Hofstede, and Pinnegar  
149 (2010). We used an experimental approach to compare short-term transcriptional responses to  
150 a projected future temperature in subtropical, temperate and desert rainbowfish ecotypes. In  
151 addition, physiological tolerance to thermal stress was assessed by empirically estimating the  
152 critical thermal maximum of each ecotype. We hypothesise that ecotype resilience in future  
153 climates will be dependent on the biogeographic region in which a given ecotype has evolved.  
154 As such, we also predict to find evidence for adaptation of plastic responses to temperature  
155 among ecotypes. To test this, we applied a comparative phylogenetic expression variance and  
156 evolution model framework to detect transcriptional responses subject to ecotype-specific  
157 directional selection. This enabled us to explore how divergent selection on gene expression  
158 may have contributed to differences in thermal tolerance and to adaptive evolution in these  
159 climatically defined ecotypes.

160

## 161 **Methods**

### 162 *Ecotype range, sampling and temperature experiments*

163 The evolution of divergent expression of genes related to thermal tolerance was assessed in  
164 three closely related species of Australian rainbowfishes (Unmack *et al.* 2013). These are the  
165 Crimson spotted rainbowfish (*Melanotaenia duboulayi*) – a species with a subtropical  
166 distribution along coastal catchments of eastern Australia, the Murray River rainbowfish (*M.*  
167 *fluviatilis*) – a temperate species found in the inland Murray-Darling Basin, and the desert  
168 rainbowfish (*M. splendida tatei*) – a species found in arid and semi-arid catchments of central  
169 Australia (Figure 1). *Melanotaenia duboulayi* individuals were collected using bait traps and

170 hand nets from the upper section of the Brisbane River, near the township of Fernvale in  
171 Queensland (subtropical; 27°26'37.39"S, 152°40'12.76"E). *Melanotaenia fluviatilis*  
172 individuals were collected from the mid section of the Murray River, close to the town of Gol  
173 Gol in New South Wales (temperate; 34°10'50.3"S 142°13'16.8"E) using a seine net.  
174 *Melanotaenia splendida tatei* individuals were collected from Algebuckina Waterhole in  
175 South Australia (desert; 27°51'53.9"S 135°53'57.1"E) using fyke nets. Between 42 and 60  
176 individuals were collected at each locality. The fish were transported live to the Flinders  
177 University animal rearing facility and acclimatised at 21°C for a minimum of 60 days prior  
178 to the start of temperature trials. Individuals from each species were maintained in single  
179 sex aquaria (~20 fish/ 100L) at 21°C under conditions of 12 h light/12 h dark and fed once  
180 daily on a mixture of blood worms and fish pellets. To assess short-term responses to  
181 contemporary (21°C) and 2070-projected (33°C) average Australian summer temperatures,  
182 individuals of each species were randomly assigned to a treatment or a control group (n =  
183 6 per group, per species). Temperature in these 'climate-change treatment' groups was  
184 increased by 2°C per day over a period of six days towards the target of 33°C, and then  
185 maintained for 14 days. The temperature (33°C) is the projected average summer  
186 temperature for Australia's east coast in 2070 based on a high emission scenario (RCP8.5)  
187 of the International Panel on Climate Change (CSIRO, 2016; Smith et al., 2013). Control  
188 groups were kept at 21°C for the duration of the experiment. Fish were euthanized in an  
189 overdose of AQUI-S<sup>®</sup> solution (50% isoeugenol) and immediately dissected to extract the  
190 liver. Sampling procedures took place in the same period of the day, between 9:00 am and  
191 11:00 am. Only adult males of similar length were used to control for sex and age-related  
192 effects on transcription responses. Liver tissue was incubated at 4°C for 12 hr in RNAlater  
193 (Ambion) as per manufacturer's instructions before storage at -80°C. In addition to being a



194 relatively homogenous tissue, liver was selected because metabolic conditioning and gene  
195 expression is known to respond to heat stress (McCairns et al., 2016; Smith et al., 2013).

196

### 197 *RNA extraction, Illumina libraries preparation and sequencing*

198 Total RNA was extracted from each individual liver tissue sample using the Ambion  
199 Magmax™-96 total RNA isolation kit (Life Sciences) according to the manufacturer's  
200 instructions and following Smith et al (2013). Integrity and concentration were evaluated  
201 with an RNA Nano assay kit on an Agilent Bioanalyzer 2100 (Agilent Technologies) and  
202 purity assessed using a NanoDrop 1000 spectrophotometer (Thermo Scientific). Normalised  
203 quantities of total RNA were then used to prepare 36 separate Illumina sequencing libraries  
204 with the TruSeq™ RNA sample preparation kit (Illumina) using the adapter indices supplied  
205 by the manufacturer (Illumina MID tags 2, 4–7, 12–16, 18, 19) and following Gates, Sandoval-  
206 Castillo, Bernatchez, and Beheregaray (2017). Individual libraries were normalised and pooled  
207 together in groups of 12 samples. The resulting three pools were each sequenced in separate  
208 100 bp paired-end lanes in an Illumina HiSeq2000 at Génome Québec Innovation Centre in  
209 Montreal, Canada.

210

### 211 *Read filtering, de novo assembly and annotation*

212 Sequence data were demultiplexed by individual and trimmed of indexing adaptors. Low-  
213 quality ( $Q < 20$ ) bases were trimmed, then remnant adapter sequences, low quality reads, and  
214 reads shorter than 45 bp were removed using TRIMMOMATIC V0.36 (Bolger, Lohse, &  
215 Usadel, 2014). Four transcriptomes were assembled *de novo* with the program TRINITY  
216 V2.5.1 (Grabherr et al., 2011) using a pipeline described in Gates et al. (2017). One  
217 transcriptome for each ecotype was assembled using both experiment and control groups of

218 each ecotype, then a *Melanotaenia* transcriptome was assembled using the samples of all  
219 ecotypes combined. The success of the completed transcriptome assembly was evaluated using  
220 read content statistics (% raw reads present), contig length distribution (N50), annotation-based  
221 metrics (% full length transcripts) and Benchmarking Universal Single-Copy Orthologs  
222 (BUSCO) software (Simão, Waterhouse, Ioannidis, Kriventseva, & Zdobnov, 2015) (Table  
223 S1). The open reading frames (ORFs) of a minimum length of 100 peptides were extracted  
224 from the assembled *Melanotaenia* transcriptome using the script TRANSDECODER V3.0  
225 (Haas et al., 2013) and identified as candidate protein coding regions. Then, where two or more  
226 transcripts showed 80% or higher similarity, all but the longest transcript were removed to  
227 generate a non-redundant set of transcripts; herein referred to as ‘unigenes’. The whole  
228 transcriptome was functionally annotated using the command blastx (Altschul, Gish, Miller,  
229 Myers, & Lipman, 1990) to query uni-genes against the UniprotKB protein database (using a  
230  $1 \times 10^{-2}$  *e*-value cut-off; Consortium, 2014) to identify homology to known proteins. In  
231 addition, any transcript showing 50% or higher similarity to any bacteria, fungus or virus genes  
232 were removed from further analysis.

233

#### 234 *Transcript quantification and differential expression analysis*

235 To test for differential expression (DE) between experimental groups and among ecotypes,  
236 reads for each sample were mapped back to the predicted protein coding regions using  
237 BOWTIE2 V2.2.7 (Langmead & Salzberg, 2012), then gene-level abundance estimations were  
238 performed with RSEM V1.2.19 (Li & Dewey, 2011). To enable comparison of expression level  
239 among samples, read count estimations were cross-sample-normalized using the trimmed mean  
240 of M-values method (TMM; Robinson and Oshlack, 2010). Normalized count data were then  
241 used as input for the program DESeq2 V1.10.1 (Love, Huber, & Anders, 2014). We used a

242 conventional threshold (e.g. McCulloch et al., 2019) specifying that transcripts with a  
243 minimum log<sub>2</sub> fold change of two between any two groups (i.e. experiment vs control, ecotype  
244 vs ecotype) were considered differentially expressed at a false discovery rate of 5%.

245

#### 246 *Gene expression plasticity and divergent selection*

247 We implemented the Expression Variance and Evolution Model (EVE) (Rohlf & Nielsen,  
248 2015) using the transcriptome of three ecotypes of *Melanotaenia* to identify transcripts  
249 potentially under divergent selection for expression levels. Briefly, the model uses a  
250 phylogenetic tree and expression data to estimate a parameter  $\beta$  that represents the ratio of  
251 among-lineage expression divergence to within-lineage expression diversity. This ratio should  
252 be approximately constant over most genes if no divergent selection is acting between lineages.  
253 For each transcript (i), the EVE model assesses the null hypothesis that independent transcript  
254  $\beta_i$  is not significantly different to a shared  $\beta_s$  for all transcripts; if  $\beta_i$  is higher than  $\beta_s$ , the model  
255 assumes that transcript i is subject to lineage-specific directional selection on expression level.  
256 Following Brauer, Unmack, and Beheregaray (2017), we considered transcripts to be under  
257 divergent selection when  $\beta_i$  was significantly higher than  $\beta_s$  at a false discovery rate of 10%.

258

259 To calculate the expected expression covariance between lineages under shared and  
260 independent evolutionary history scenarios, we constructed a phylogenetic tree, using genome-  
261 wide SNP (single nucleotide polymorphisms) data from 12 samples of each ecotype. These  
262 data were obtained using reduced-representation sequencing methods (ddRAD) in previous  
263 studies of population genomics of the three ecotypes (Brauer et al. 2018, Attard et al. in review;  
264 Smith et al. in review; Supplementary Information X). The software PyRAD V3.0.6 (Eaton,  
265 2014) was used to align the genome-wide sequences and RAXML V8.2.1 (Stamatakis, 2014)

266 was used to perform a maximum-likelihood phylogenetic analysis, with the GTRGAMMA  
267 model and 1000 bootstrap replicates. The final concatenated dataset for the 36 rainbowfishes  
268 was based on 529 loci and 44681 bp. The consensus phylogenetic tree was used as the input  
269 phylogeny for the EVE analysis.

270

### 271 *Gene ontology enrichment analysis and pathway network analysis*

272 We performed an enrichment analysis on the DE genes and on the EVE candidate genes relative  
273 to all genes, using the R package TOPGO v2.34 (Alexa & Rahnenfuhrer, 2010). For this  
274 analysis, terms were considered to be enriched if they were significant in both Fisher's classic  
275 and weight tests with a  $P \leq 0.01$ . Moreover, to understand the relative importance of candidate  
276 and shared plastic genes in the response of rainbowfishes to heat stress, a network analysis was  
277 conducted using CYTOSCAPE V3.7 (Shannon et al., 2003). First, a protein interaction  
278 network was created from the entire DE gene set by drawing edges between genes with physical  
279 and functional interactions reported for humans and with orthologous functions in zebrafish in  
280 the STRING database (Szklarczyk et al., 2016). The relative importance of a protein is  
281 correlated with its connectivity in an interactive network. We calculated the node degrees as  
282 an estimator of protein connectivity. Then we identified highly connected genes (hubs) as those  
283 with a node degree greater than or equal to the sum of the mean plus twice the standard  
284 deviation of the node degree distribution (Rakshit, Rathi, & Roy, 2014).

285

### 286 *Determination of thermal tolerance ( $CT_{MAX}$ )*

287 We determined the thermal tolerance of each ecotype via short-term  $CT_{MAX}$  experiments  
288 following Becker and Genoway (1979). To control for sex and age-related effects, we collected  
289 10 females of each ecotype from the same populations used for the transcriptomic experiments.

290 After acclimation to 21°C for a minimum period of 60 days, each fish was placed individually  
291 in a 5 L glass beaker containing 3L of water at 21°C. Water temperature was increased at a rate  
292 of approximately 1°C every 3 minutes (rate of 0.33°C/min) using a digital water bath SWBD  
293 (Stuart®). We stopped the experiment and recorded the temperature when the fish showed both  
294 motor disorganization and loss of equilibrium for a period of one minute. Motor  
295 disorganization was considered when the swimming pattern was evidently changed with  
296 respect to their original condition; loss of equilibrium was determined when the fish turned  
297 upside down while swimming. Thermal limit for a given ecotype was obtained by averaging  
298 over 10 independent replicates. An ANOVA test was used to assess statistical differences in  
299 CT<sub>MAX</sub> among ecotypes.

300

## 301 **Results**

### 302 *Transcriptome sequencing and assembly*

303 Illumina sequencing of the 36 individual libraries produced over 848 million paired-end reads  
304 (2 x 100 bp). After trimming and quality filtering, 741 million reads (87.4%) were retained  
305 (Table S1) for the *de novo* assemblies of each of the three ecotypes as well as the combined  
306 assembly for the genus *Melanotaenia*. The *Melanotaenia* assembly resulted in a total of  
307 457,235 contigs (‘Trinity transcripts’), and 269,386 genes (‘Trinity genes’) from which 37,160  
308 ORFs were detected and 34,815 uni-genes were identified (Table S1). Based on all transcript  
309 contigs, an N50 of 1702 and an average contig length of 904 were achieved. Assembly  
310 completeness assessment using BUSCO found a high percentage of genes in common with fish  
311 gene datasets (e.g. 89.2% for *Melanotaenia*, Fig. S1). All downstream analyses were based on  
312 the reference set of 34,815 *de novo* assembled uni-genes.

313

314

315 *Differential expression analysis*

316 Of the 34,815 uni-genes, over 81% (28,483) were present in all three *Melanotaenia* ecotypes,  
317 with low percentages of uni-genes exclusive to each ecotype (Fig. 2A). Comparison of gene  
318 expression profiles among ecotypes and between climate-change treatments identified 2,409  
319 differentially expressed (DE) uni-genes. Expression profiles of these genes showed a strong  
320 phylogenetic pattern with individuals showing the highest correlation of transcription  
321 responses within ecotypes, followed by high correlation between experiment and control  
322 groups within each ecotype (Fig. 2B, see also below). On the other hand, when gene expression  
323 was compared between experimental treatments, only 236 DE uni-genes were identified (Fig.  
324 3A). Of these, 16 uni-genes were DE between treatments in two or more ecotypes (Fig. 3B),  
325 indicating shared plasticity for those genes. In contrast, unique plastic responses to projected  
326 summer temperatures were observed for the temperate ecotype in 27 uni-genes, the desert  
327 ecotype in 84 uni-genes and the subtropical ecotype in a much higher 109 uni-genes. This  
328 indicates a strong effect of phylogeny on plastic gene expression but may also represent the  
329 effects of divergent selection and adaptation to unique climatic ecoregions.

330

331 *Divergent selection on gene expression*

332 The RAXML majority-rule consensus tree provided strong support for reciprocal monophyly  
333 of each ecotype (i.e. each named taxon), with all individuals from each ecotype clustering  
334 within a single clade (Fig. 1B). The topology is consistent with previous studies (McGuigan et  
335 al., 2000) that indicated a sister relationship between the temperate (*M. fluviatilis*) and the  
336 subtropical (*M. duboulayi*) ecotypes. This consensus tree was used as the input phylogeny for  
337 the EVE analysis (Fig. 1B). Of the 34,815 uni-genes assessed with the EVE, 532 were

338 identified as candidates subject to lineage-specific directional selection on expression level  
339 (FDR 10%). These were the genes that showed greater expression variance among rather than  
340 within lineages after controlling for phylogenetic effects. The dendrogram of individuals based  
341 on these genes was consistent with phylogenetic patterns (Fig. S2) which showed greater  
342 differentiation between subtropical and desert ecotypes. Out of these 532 candidate genes, 23  
343 were also identified as differentially expressed between treatments (Fig. 4A). The expression  
344 profiles of these genes are more similar between the same treatment for subtropical and  
345 temperate ecotypes, than between among treatments within the same ecotype. This was not the  
346 case for the desert ecotype, for which control and experiment are differentiated, yet cluster  
347 together. Only one of these 23 EVE candidate genes is DE between treatments in all ecotypes.  
348 This suggests that the plastic gene expression responses for these 23 genes are under divergent  
349 selection for resilience to heat stress among ecotypes, with the greatest differences between  
350 desert and the other two ecotypes.

351

### 352 *Functional annotation, enrichment analysis and network analysis*

353 Uni-genes aligned to UniprotKB resulted in 25,315 protein hits, of which 24,276 (96%) were  
354 assigned to a total of 293,781 GO terms (Supplementary Information Table S6). Enrichment  
355 analysis of GO terms assigned to the 236 DE uni-genes between experiment and control (Fig.  
356 3A) found terms for five molecular functions (MF), 13 biological processes (BP) and five  
357 cellular components (CC) significantly enriched ( $p < 0.01$ ; Table S3). The same enrichment  
358 analysis using the 23 EVE candidates for divergent selection that were also identified as DE  
359 between treatments (Fig. 4A) found three MF, four BP and two CC terms significantly enriched  
360 ( $p < 0.01$ ; Table S4).

361

362 The protein network analysis identified six genes with high degree of interaction, all of which  
363 were heat shock proteins. These hub genes included the only uni-gene identified as DE in all  
364 three ecotypes, and as a candidate for divergent selection by the EVE model (Fig. 4B; Table  
365 S5). In addition, the 16 uni-gene candidates for shared plasticity found to be DE between  
366 treatments in two or more ecotypes, as well as the 23 EVE candidate genes related to heat stress  
367 response between treatments, showed higher average node degrees compared with the rest of  
368 the DE genes (Table S5). This suggests an important role of these genes in plastic and adaptive  
369 heat stress responses of rainbowfish, respectively.

370

#### 371 *Empirical thermal tolerance ( $CT_{MAX}$ )*

372 Thermal tolerance was significantly different among ecotypes ( $p = <0.001$ , Table S2, Fig 5)  
373 with the highest  $CT_{MAX}$  shown by the subtropical ecotype (38.0°C; CI=37-38.6°C), followed  
374 by the desert ecotype (37.2°C; CI=36.1-37.6°C) and finally the temperate ecotype (34.9°C;  
375 CI=33.1-36.5°C). Interestingly, the inferred estimates of  $CT_{MAX}$  across ecotypes were  
376 correlated with the number of DE uni-genes between climate change treatments displayed by  
377 each ecotype ( $r= 0.998$ , Fig. 5).

378



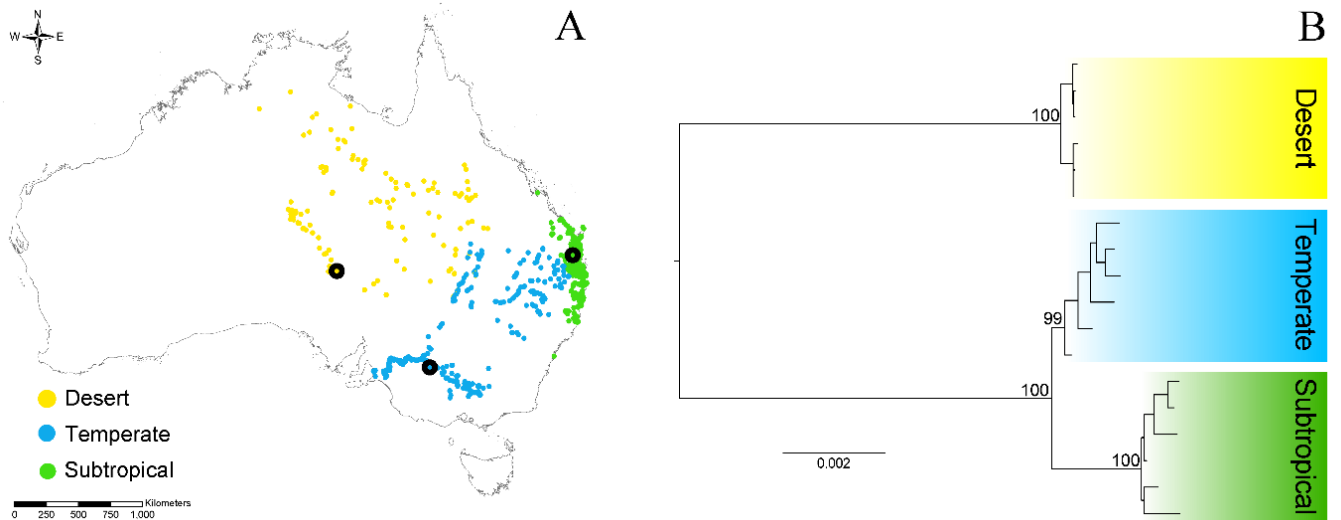

379  
 380 Fig. 1 **A)** Spatially-validated records and range of the three *Melanotaenia* ecotypes, black circles  
 381 show sampling localities for the transcriptomic and physiological experiments. **B)** Maximum  
 382 Likelihood tree depicting evolutionary relationships among 36 individuals of the three ecotypes based  
 383 on ddRAD sequences of 529 loci and 44681 bp. Numbers above nodes denote bootstrap support  
 384 values.

385

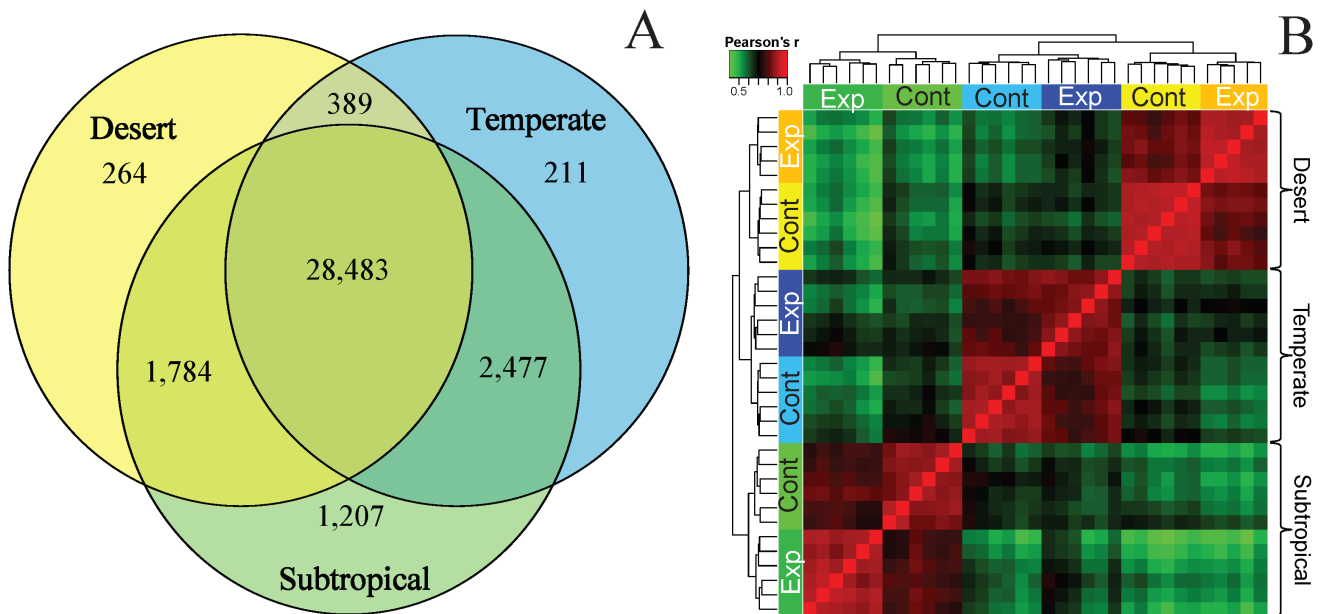

386

387 Fig. 2 **A)** Venn diagram of uni-genes identified in each ecotype of *Melanotaenia* as well as shared  
 388 among ecotypes (based on a total of 34,815 uni-genes). **B)** Heatmap summarizing correlation among  
 389 ecotypes in log<sub>2</sub> gene expression profiles. This analysis was based on 2,409 differentially expressed  
 390 transcripts. Coloured bars under the sample dendrograms represent the climate-change experiment  
 391 (Exp) and control (Cont) groups.

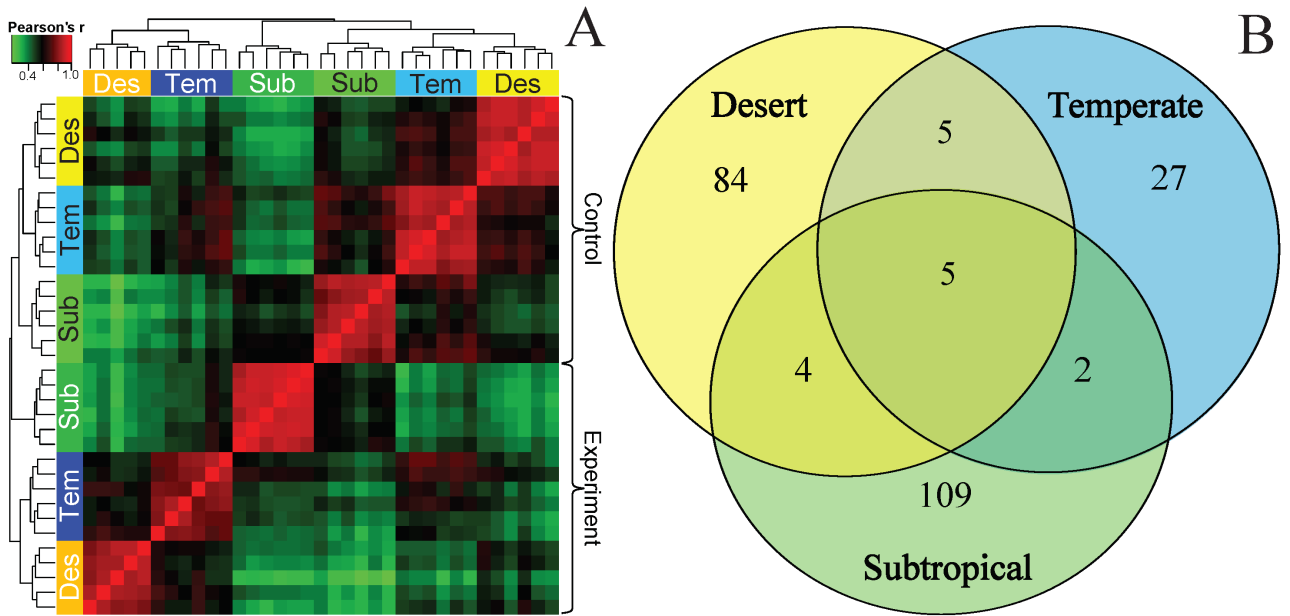

392

393 Fig. 3 **A)** Heatmap summarizing correlation between treatments (Control vs Experiment) in log<sub>2</sub> gene  
 394 expression profiles. This analysis was based on 236 differentially expressed uni-genes identified  
 395 between Control and Experiment samples. Coloured bars under the sample dendrograms represent the  
 396 ecotypes, with climate-change experiment groups represented by dark colour variation and control  
 397 groups represented by light colour variation. **B)** Venn diagram of differentially expressed uni-genes  
 398 shared between ecotypes.

399

400

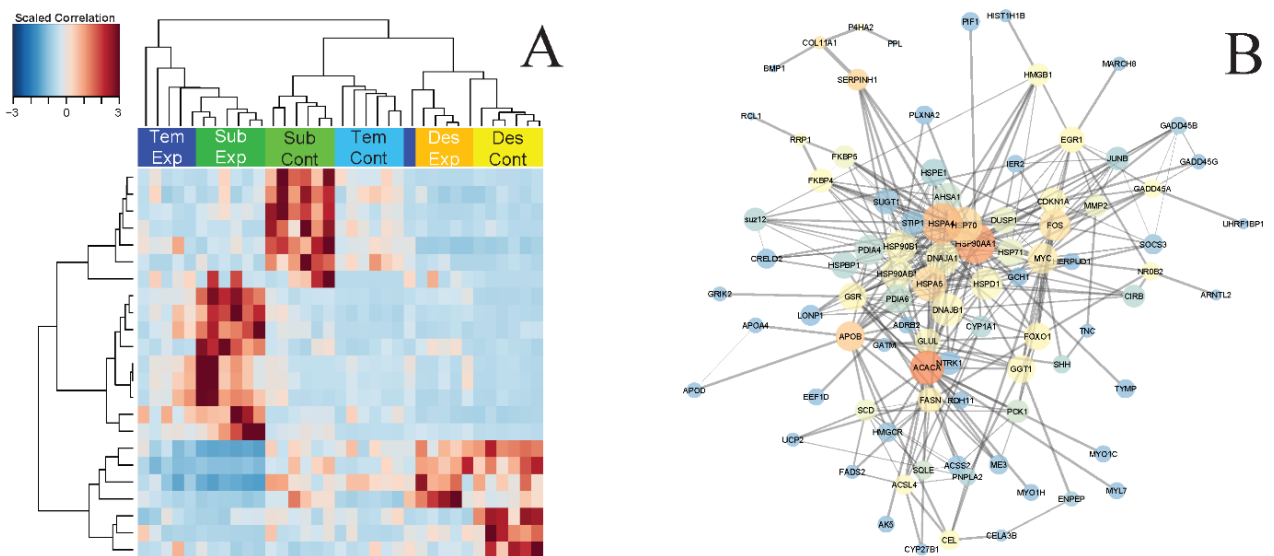

401

402 Fig. 4 **(A)** Hierarchical clusters of 23 transcripts identified as candidates for divergent selection on  
 403 expression level and also showing significant differential expression between control and experiment.  
 404 Color bars indicate the ecotype of the samples. TemCont=Temperate control (20°C), TemExp=  
 405 Temperate experimental (33°C), SubCont=Subtropical control (20°C), SubExp= Subtropical  
 406 experimental (33°C), DesCont= Desert control (20°C), DesExp= Desert experimental (33°C). **(B)**  
 407 Protein interaction network containing 137 heat stress associated proteins lined via 1114

408 interactions. Size of node is proportional to its centrality in the network, color of node indicates the  
409 relative number of interactions it is directly involved (blue lower – red higher number of interactions),  
410 both color and size of the node indicate relative importance of the protein in *Melanotaenia* heat stress  
411 response.  
412

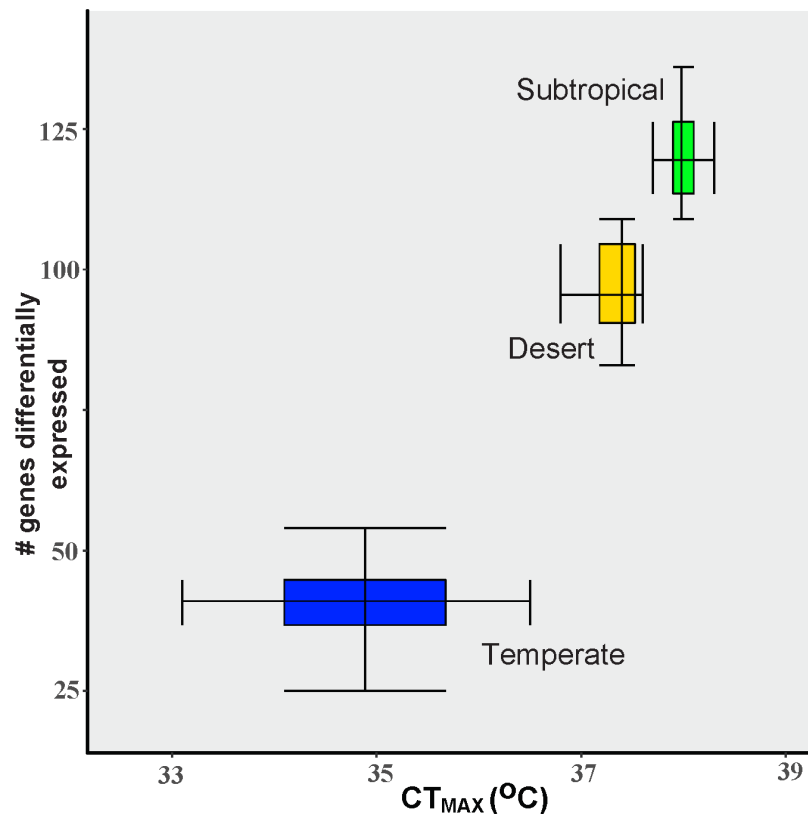

413

414 Fig. 5 Association between CT<sub>MAX</sub> and number of genes differentially expressed in response to heat  
415 stress in three ecotypes of *Melanotaenia* ( $r=0.998$ ). Box plots display the upper and lower quartiles,  
416 whiskers represent 95 and 5 percentiles, and their intersections represent the median.

417

418

## 419 Discussion

420 We compared transcriptional plasticity to projected future temperatures and physiological  
421 tolerance to thermal stress in three contrasting climatic ecotypes of Australian rainbowfish:  
422 temperate, desert and subtropical. Within ecotypes, individuals exhibited very similar changes  
423 in both the direction and the magnitude of expressed genes. On the other hand, despite most  
424 expressed genes being identified in the transcriptomes of all ecotypes (i.e. 81% of the 34,815  
425 uni-genes), response mechanisms to predicted thermal stress differed remarkably among

426 ecotypes. Interestingly, both the plastic responses and tolerance to thermal increases varied in  
427 a biogeographically determined manner. Subtropical rainbowfish showed both the highest  
428 transcription response and tolerance to thermal stress amongst ecotypes, temperate rainbowfish  
429 showed the lowest responses for both mechanisms, and desert rainbowfish showed  
430 intermediate transcriptional responses and physiological tolerance. Although all species  
431 mounted substantial responses to 2070-projected summer temperatures, a striking result was  
432 that transcriptional changes common to all three ecotypes were limited to only five genes, thus  
433 confirming variation in plastic responses to thermal stress among ecotypes.

434

435 Such divergence in plastic responses between ecotypes is consistent with lineage-specific  
436 adaptation resulting from contrasting selective pressures across the climatically-defined  
437 bioregions, but can also be associated with neutral mechanisms of evolution (Dunn et al., 2013;  
438 Whitehead, 2012; Whitehead & Crawford, 2006). For this reason, we incorporated a  
439 phylogenetic model (EVE) to control for the effects of neutral drift on gene expression (Rohlf  
440 & Nielsen, 2015). This approach identified a large suite of candidates for divergent selection  
441 on gene expression between ecotypes, of which a subset of 23 genes also showed significant  
442 ecotype-specific response to thermal manipulation (Fig. 4A). We consider these as strong  
443 candidates for adaptive (i.e. genetic-based) plastic response to future increases in temperature.  
444 Network analyses demonstrated centrality of these genes in thermal response pathways, while  
445 also identifying several highly conserved hub genes. These genes appear to be of fundamental  
446 importance for modulating thermal response pathways and adaptive potential in the three  
447 ecotypes. Together, these results show that while integral expression responses can be  
448 conserved among lineages, the tendency for divergence in response to thermal stress is high.  
449 This divergence not only exceeds neutral expectations but corresponds to differences in thermal

450 tolerance across climatically defined bioregions, speaking to the importance of biogeographic  
451 history in considerations of climate-adaptive potential.

452

453 *Adaptive mechanisms contribute to gene expression plasticity among ecotypes*

454 Shifts in gene expression regulation have for a long time been hypothesised to contribute to  
455 adaptive diversity (King & Wilson, 1975). However, the evolution of plastic responses by  
456 natural selection has been infrequently documented in empirical studies, particularly in natural  
457 populations (but see Whitehead and Crawford (2006); McCairns and Bernatchez (2010);  
458 Kenkel and Matz (2016); Roelofs et al. (2009); Kingsolver and Buckley (2017)). Although a  
459 diversity of mechanisms regulate gene expression (Orphanides & Reinberg, 2002), substantial  
460 empirical evidence supports heritability of expression responses (Roberge, Guderley, &  
461 Bernatchez, 2007; Schadt et al., 2003; Whitehead & Crawford, 2006), as recently demonstrated  
462 in the subtropical Australian rainbowfish (*M. duboulayi*) (McCairns et al., 2016). As such,  
463 plasticity is likely to be subject to the same broad evolutionary processes as other heritable  
464 traits. For instance, under directional selection, limited expression polymorphism is expected  
465 within ecotypes, while extensive divergence is expected between ecotypes (Hodgins-Davis &  
466 Townsend, 2009). Under stabilising selection, expression regulation is predicted to be highly  
467 consistent within and across ecotypes (Ghalambor et al., 2007; Hodgins-Davis & Townsend,  
468 2009). Meanwhile, under neutral evolution, patterns of gene expression are expected to  
469 correlate with evolutionary divergence (Whitehead & Crawford, 2006), which in our case was  
470 assessed using a phylogenomic-based approach. Our comparative analyses suggested that all  
471 of the above mechanisms have influenced gene expression responses to projected thermal stress  
472 in rainbowfishes. This fits with our understanding of thermal tolerance adaptation in ectotherms

473 as highly complex, and involving multiple levels of biological organisation (Cossins, 2012;  
474 Pritchard & Di Rienzo, 2010).

475

476 The majority of DE genes under 2070-projected temperature manipulation exhibited patterns  
477 of variation that could be associated with phylogenetic distance (Fig. 1B; Fig. 2B). This  
478 demonstrates that plastic responses to future climates can be highly constrained by  
479 demographic history, even among groups which are as recently diverged as Australian  
480 rainbowfishes (Unmack, Allen, & Johnson, 2013). Nonetheless, we were able to reject neutral  
481 scenarios as the most parsimonious explanation for the variation in a large subset of DE genes.  
482 In the case of the EVE candidates for directional selection to thermal stress, there was very  
483 little expression polymorphism within ecotypes, but high levels of divergence between  
484 ecotypes. We suggest that regulatory differences in these genes have helped to facilitate  
485 persistence of rainbowfish ecotypes within their respective thermal environments, bringing  
486 each closer to a local phenotypic optimum. While evidence of ecological selection on plasticity  
487 is rare, an example includes the gene expression divergence of a soil-dwelling hexapod  
488 (*Orchesella cincta*) in populations subsisting in contaminated mine sites (Roelofs et al., 2009).  
489 This was correlated with heavy metal tolerance, which resulted in a heritable increase in metal  
490 excretion efficiency. Similarly, Brennan, Galvez, and Whitehead (2015) demonstrated a shift  
491 in salinity-specific expression responses in populations of killifish (*Fundulus heteroclitus*) in  
492 populations adapted to habitats of contrasting salinity.

493

494 The centre of the gene interaction network for the three rainbowfish ecotypes consisted largely  
495 of heat shock proteins, which play an important role in thermal responses in a wide variety of  
496 taxa (Chen, Farrell, Matala, & Narum, 2018; Feder & Hofmann, 1999). Patterns of plastic

497 responses to temperature were most likely to be shared among ecotypes in these central ‘hub’  
498 genes (Table S5). This indicates a conserved functional role, which may have been retained  
499 through purifying and possibly stabilising selection. Hub genes influence the expression and  
500 activity of genes downstream in an expression network, and tend to be highly conserved in  
501 their expression between lineages (Evans, 2015). In genome-wide studies of model organisms,  
502 the deletion of hub genes is more likely to be deleterious than for non-hub genes. This can be  
503 due to either compromised network structure, or simply because they are more likely to be  
504 involved in essential interactions (He & Zhang, 2006). However, the fact that the EVE  
505 candidates for divergent expression among ecotypes also exhibited greater average  
506 connectedness than other DE genes (Table S5) suggests the importance of these genes in the  
507 respective ecological adaptations they have likely facilitated. In fact, three EVE candidates  
508 were also identified as hub genes, and one of these shows plasticity in all ecotypes  
509 (HSP90AA1). A change in expression in one or a few hub genes could therefore translate to a  
510 completely different stress response pathway. Indeed, enrichment analyses indicate that  
511 functions as diverse as metabolism, immune response, oxidative stress response, DNA damage  
512 response, signal transduction and other stress responses are contributing to local adaptation  
513 among temperate, desert and subtropical ecotypes.

514

515 While the transcriptomic methods used here directly address mechanisms for thermal response,  
516 we are not yet able to infer specific fitness effects of divergent expression patterns in warming  
517 climates. Despite this, the number of genes regulated in response to warming differed markedly  
518 between ecotypes, with the greatest number responding in the most heat-resilient subtropical  
519 ecotype ( $CT_{MAX}$  38.0°), and the smallest number responding in the least heat-resilient  
520 temperate ecotype ( $CT_{MAX}$  34.9°). Similarly, previous work comparing montane and desert  
521 redband trout (*Oncorhynchus mykiss gairdneri*) found that the more resilient desert trout

522 regulated a larger number of genes than the less resilient montane trout in response to acute  
523 warming conditions (Garvin, Thorgaard, & Narum, 2015; Narum & Campbell, 2015). While  
524 the absolute number of transcripts regulated in a given condition can depend on many factors,  
525 including differences in constitutive expression or qualitative differences such as amino acid  
526 or regulatory changes (Somero, 2010), it is possible that a larger number of regulated genes  
527 may often reflect a more sophisticated plastic response to environmental stressors. In the case  
528 of rainbowfish, it is too early to say whether the observed increase in number of DE genes  
529 represents a more specialised adaptation to heat by the subtropical rainbowfish compared to  
530 desert and temperate ecotypes. However, the association between thermal tolerance and  
531 number of regulated transcripts does provide further evidence to support adaptive differences  
532 in the potential for expression-mediated phenotypic plasticity.

533

#### 534 *Physiological thermal tolerance is specific to ecotype*

535 It is generally assumed that organisms are adapted to or have the ability to acclimate to the  
536 temperatures normally encountered in their habitat range (Ghalambor et al., 2006). Thus, it has  
537 been proposed that organisms that evolved in warmer climates will have higher thermal  
538 tolerances than those in cool climates (Vernberg, 1959), and that those which have evolved in  
539 variable climates will have greater acclimation capacities and tolerance ranges than those in  
540 more stable climates (Janzen, 1967). Here, we found that critical thermal maximum ( $CT_{MAX}$ )  
541 differed significantly among ecotypes, with the temperate ecotype displaying the lowest  
542 average thermal tolerance ( $34.9^{\circ}C$ ), the desert ecotype displaying intermediate thermal  
543 tolerance ( $37.2^{\circ}C$ ), and the subtropical ecotype displaying the highest thermal tolerance  
544 ( $38.0^{\circ}C$ ). Consistent with several studies assessing relationships between thermal tolerance and  
545 latitude (Addo-Bediako et al., 2000; Aguilar-Kirigin & Naya, 2013; Deutsch et al., 2008;



546 Ghalambor et al., 2006; Magozzi & Calosi, 2015; Sunday et al., 2011), the observed pattern of  
547 rainbowfish  $CT_{MAX}$  is an increase with proximity to the equator. However, in this instance  
548  $CT_{MAX}$  does not coincide with average maximum summer temperatures (or even average yearly  
549 temperatures) experienced in the climate of origin, with the hottest Australian temperatures  
550 found in the central deserts as opposed to the north-eastern subtropical region (Table S2, BOM  
551 2014).

552

553 Perhaps counterintuitively, this finding is consistent with previous research which has  
554 emphasised the importance of temperature variability in relation to an organism's upper limits  
555 of thermal tolerance (Ghalambor et al., 2006; Magozzi & Calosi, 2015; Sunday et al., 2011).  
556 Although wider ranges of tolerance have been found at higher latitudes, these have been largely  
557 attributed to lower critical thermal minimums of the temperate organisms studied (Addo-  
558 Bediako et al., 2000; Ghalambor et al., 2006). Meanwhile, higher thermal tolerances have been  
559 observed in tropical regions, but with an inverse relationship to tolerance breadth (Comte &  
560 Olden, 2016). This has led to the use of the term 'climate specialists' to describe tropical  
561 species, with an evolutionary trade-off suggested to exist between upper thermal tolerance and  
562 the capacity to acclimate to a wide range of temperatures (Comte & Olden, 2016; Deutsch et  
563 al., 2008; Payne & Smith, 2017; Tewksbury, Huey, & Deutsch, 2008).

564

565 Due to this apparent trade-off, our findings may highlight an unforeseen risk for desert taxa.  
566 The low humidity of desert environments allows rapid heat transfer, exposing organisms to  
567 some of the most extreme temperature variations both diurnally and annually. Of the three  
568 ecotypes assessed, the desert rainbowfish is currently faced with temperatures closest to its  
569  $CT_{MAX}$  (Table S2; BOM, 2014), and its ability to adapt to extremely high temperatures may be

570 compromised by the need to maintain a large window of tolerance. It is already common for  
571 ambient temperatures at the desert rainbowfish's sampling location (BOM, 2014) to exceed its  
572  $CT_{MAX}$ , though larger water bodies are unlikely to reach such extremes due to the fluctuation  
573 in diurnal temperatures ( $\sim 15^{\circ}C/day$ ) and slow rates of heat exchange between air and water  
574 (Livingstone & Lotter, 1998). However, desert environments are predicted to experience more  
575 extreme heat waves and longer droughts under climate change scenarios (IPCC, 2014). This is  
576 likely to not only increase the length of time in which organisms are exposed to thermal stress  
577 conditions, but decrease the overall volume of aquatic refugia, making them more susceptible  
578 to ambient temperatures (Magoulick & Kobza, 2003). In such circumstances, typical  
579 behavioural responses such as seeking shade or cool-water sites created by deeper water or  
580 inflowing tributaries may be unable to compensate for these effects (Breau, Cunjak, & Peake,  
581 2011; Magoulick & Kobza, 2003). Our data support a high risk for desert species relative to  
582 the other ecotypes, which is consistent with at least one species distribution modelling approach  
583 (Wiens, Stralberg, Jongsomjit, Howell, & Snyder, 2009) and a functional trait analysis (Vale  
584 & Brito, 2015), but not with a broader study using the vegetation sensitivity index (Seddon,  
585 Macias-Fauria, Long, Benz, & Willis, 2016). This lack of consensus is symptomatic of the  
586 current poor understanding of desert ecosystems and disparate approaches used to examine  
587 potential impacts of global change in these regions (Maestre, Salguero-Gomez, & Quero,  
588 2012), highlighting the need for an integrated reassessment of dryland vulnerability to climate  
589 change.

590

### 591 *Conclusions and perspectives*

592 Climate change is creating a discord between some organisms' physiologies and their  
593 environments. In order to predict the likelihood of range shifts, population declines or local

594 extinctions, it is useful to understand the distribution of adaptive diversity, including that of  
595 adaptive plasticity. However, despite extensive empirical studies about standing genetic  
596 variation and its effects on climate related traits, the concept of adaptive plasticity remains  
597 relatively unaddressed. Here, we compared transcriptional and physiological responses to  
598 projected future temperatures in three contrasting climatic ecotypes of Australian rainbowfish,  
599 to test the effects of ecotype-specific directional selection on plasticity. Our results supported  
600 the hypothesis that the capacity for plastic response to climate will vary biogeographically,  
601 even within a closely related group. Moreover, by controlling for the effects of phylogeny, we  
602 were able to infer that divergent selection on gene expression has contributed to observed  
603 differences in plastic capacity among ecotypes. By demonstrating immediate response  
604 mechanisms to thermal stress, as well as evidence for ecological selection on these mechanisms  
605 among lineages, our results emphasise the key role of plasticity in both short- and long-term  
606 climatic adaptation. While it is too early to link the observed transcriptional responses to direct  
607 measures of fitness, the proxy provided by the assessment of thermal tolerance provides a  
608 strong indication of ecological relevance. This has wide-ranging implications both for broad  
609 biogeographic assessments of climate impacts, as well as for more focussed predictions of  
610 species distribution changes which are only now beginning to account for intra-taxonomic  
611 adaptive variation. This study represents a stride towards a more holistic understanding of  
612 climatic adaptive potential in natural populations.

613

#### 614 **Acknowledgements**

615 We thank Leo O'Reilly, Catherine Attard and David Schmarr for assistance with sampling, and  
616 Leslie Morrison and her team for assistance with fish husbandry. Animal ethical approval was  
617 received from Flinders University (AWC E342 and AWC E429). This study was funded by the

618 Australian Research Council (ARC grants DP110101207 and DP150102903 to L.B.B and L.B.  
619 and FT130101068 to L.B.B.).

620

## 621 **References**

- 622 Addo-Bediako, A., Chown, S. L., & Gaston, K. J. (2000). Thermal tolerance, climatic variability and  
623 latitude. *Proceedings of the Royal Society B: Biological Sciences*, 267(1445), 739-745.
- 624 Aguilar-Kirigin, Á. J., & Naya, D. E. (2013). Latitudinal patterns in phenotypic plasticity: the case of  
625 seasonal flexibility in lizards' fat body size. *Oecologia*, 173(3), 745-752. doi:10.1007/s00442-  
626 013-2682-z
- 627 Aitken, S. N., & Whitlock, M. C. (2013). Assisted gene flow to facilitate local adaptation to climate  
628 change. *Annual Review of Ecology, Evolution, and Systematics*, 44, 367-388.
- 629 Alexa, A., & Rahnenfuhrer, J. (2010). topGO: enrichment analysis for gene ontology. *R package version*,  
630 2(0).
- 631 Altschul, S., Gish, W., Miller, W., Myers, E., & Lipman, D. (1990). 3.1 Sequence searches-challenges.  
632 *Journal of Molecular Biology*, 215, 403-410.
- 633 Araújo, M. B., Whittaker, R. J., Ladle, R. J., & Erhard, M. (2005). Reducing uncertainty in projections of  
634 extinction risk from climate change. *Global Ecology and Biogeography*, 14(6), 529-538.
- 635 Bay, R. A., Rose, N., Barrett, R., Bernatchez, L., Ghalambor, C. K., Lasky, J. R., . . . Ralph, P. J. T. A. N.  
636 (2017). Predicting responses to contemporary environmental change using evolutionary  
637 response architectures. *The American Naturalist*, 189(5), 463-473.
- 638 Becker, C. D., & Genoway, R. G. (1979). Evaluation of the critical thermal maximum for determining  
639 thermal tolerance of freshwater fish. *Environmental Biology of Fishes*, 4(3), 245.
- 640 Bolger, A. M., Lohse, M., & Usadel, B. (2014). Trimmomatic: a flexible trimmer for Illumina sequence  
641 data. *Bioinformatics*, btu170.
- 642 BOM. (2014). Bureau of Meteorology climate data online.
- 643 Brauer, C. J., Unmack, P. J., & Beheregaray, L. B. (2017). Comparative ecological transcriptomics and  
644 the contribution of gene expression to the evolutionary potential of a threatened fish.  
645 *Molecular Ecology*, 26(24), 6841-6856.
- 646 Brauer, C. J., Unmack, P. J., Smith, S., Bernatchez, L., & Beheregaray, L. B. (2018). On the roles of  
647 landscape heterogeneity and environmental variation in determining population genomic  
648 structure in a dendritic system. *Molecular Ecology*, 27(17), 3484-3497.
- 649 Breau, C., Cunjak, R. A., & Peake, S. J. (2011). Behaviour during elevated water temperatures: can  
650 physiology explain movement of juvenile Atlantic salmon to cool water? *Journal of Animal  
651 Ecology*, 80(4), 844-853.
- 652 Brennan, R. S., Galvez, F., & Whitehead, A. (2015). Reciprocal osmotic challenges reveal mechanisms  
653 of divergence in phenotypic plasticity in the killifish *Fundulus heteroclitus*. *The Journal of  
654 Experimental Biology*, 218(8), 1212-1222. doi:10.1242/jeb.110445
- 655 Calosi, P., Bilton, D. T., Spicer, J. I., Votier, S. C., & Atfield, A. (2010). What determines a species'  
656 geographical range? Thermal biology and latitudinal range size relationships in European  
657 diving beetles (Coleoptera: Dytiscidae). *Journal of Animal Ecology*, 79(1), 194-204.
- 658 Catullo, R. A., Ferrier, S., & Hoffmann, A. A. (2015). Extending spatial modelling of climate change  
659 responses beyond the realized niche: estimating, and accommodating, physiological limits and  
660 adaptive evolution. *Global Ecology and Biogeography*, 24(10), 1192-1202.
- 661 Cavaleri, M. A., Reed, S. C., Smith, W. K., & Wood, T. E. (2015). Urgent need for warming experiments  
662 in tropical forests. *Global Change Biology*, 21(6), 2111-2121.

- 663 Chen, Z., Farrell, A. P., Matala, A., & Narum, S. R. (2018). Mechanisms of thermal adaptation and  
664 evolutionary potential of conspecific populations to changing environments. *Molecular*  
665 *Ecology*, 27(3), 659-674. doi:doi:10.1111/mec.14475
- 666 Cianfrani, C., Satizábal, H. F., & Randin, C. (2015). A spatial modelling framework for assessing climate  
667 change impacts on freshwater ecosystems: Response of brown trout (*Salmo trutta* L.) biomass  
668 to warming water temperature. *Ecological Modelling*, 313, 1-12.  
669 doi:<http://dx.doi.org/10.1016/j.ecolmodel.2015.06.023>
- 670 Cohet, Y., Vouldibio, J., & David, J. (1980). Thermal tolerance and geographic distribution: a  
671 comparison of cosmopolitan and tropical endemic *Drosophila* species. *Journal of Thermal*  
672 *Biology*, 5(2), 69-74.
- 673 Compton, T. J., Rijkenberg, M. J., Drent, J., & Piersma, T. (2007). Thermal tolerance ranges and climate  
674 variability: a comparison between bivalves from differing climates. *Journal of Experimental*  
675 *Marine Biology and Ecology*, 352(1), 200-211.
- 676 Comte, L., & Olden, J. D. (2016). Evolutionary and environmental determinants of freshwater fish  
677 thermal tolerance and plasticity. *Global Change Biology*, 23(2), 728-736.
- 678 Conesa, A., Madrigal, P., Tarazona, S., Gomez-Cabrero, D., Cervera, A., McPherson, A., . . . Mortazavi,  
679 A. (2016). A survey of best practices for RNA-seq data analysis. *Genome Biology*, 17, 13.  
680 doi:10.1186/s13059-016-0881-8
- 681 Cossins, A. (2012). *Temperature biology of animals*: Springer Science & Business Media.
- 682 CSIRO. (2016). Climate change in Australia: Australian climate futures tool. Retrieved from  
683 [https://www.climatechangeinaustralia.gov.au/en/climate-projections/climate-futures-](https://www.climatechangeinaustralia.gov.au/en/climate-projections/climate-futures-tool/introduction-climate-futures/)  
684 [tool/introduction-climate-futures/](https://www.climatechangeinaustralia.gov.au/en/climate-projections/climate-futures-tool/introduction-climate-futures/)
- 685 De Wit, P., Pespeni, M. H., Ladner, J. T., Barshis, D. J., Seneca, F., Jaris, H., . . . Palumbi, S. R. (2012). The  
686 simple fool's guide to population genomics via RNA-Seq: an introduction to high-throughput  
687 sequencing data analysis. *Molecular Ecology Resources*, 12(6), 1058-1067. doi:10.1111/1755-  
688 0998.12003
- 689 Deutsch, C. A., Tewksbury, J. J., Huey, R. B., Sheldon, K. S., Ghalambor, C. K., Haak, D. C., & Martin, P.  
690 R. (2008). Impacts of climate warming on terrestrial ectotherms across latitude. *Proceedings*  
691 *of the National Academy of Sciences*, 105(18), 6668-6672.
- 692 Dormann, C. F., Schymanski, S. J., Cabral, J., Chuine, I., Graham, C., Hartig, F., . . . Schröder, B. (2012).  
693 Correlation and process in species distribution models: bridging a dichotomy. *Journal of*  
694 *Biogeography*, 39(12), 2119-2131.
- 695 Dunn, C. W., Luo, X., & Wu, Z. (2013). Phylogenetic Analysis of Gene Expression. *Integrative and*  
696 *Comparative Biology*, 53(5), 847-856. doi:10.1093/icb/ict068
- 697 Eaton, D. A. (2014). PyRAD: assembly of de novo RADseq loci for phylogenetic analyses. *Bioinformatics*,  
698 btu121.
- 699 Engelhard, G. H., Ellis, J. R., Payne, M. R., ter Hofstede, R., & Pinnegar, J. K. (2010). Ecotypes as a  
700 concept for exploring responses to climate change in fish assemblages. *ICES Journal of Marine*  
701 *Science*. doi:10.1093/icesjms/fsq183
- 702 Evans, M. E., Merow, C., Record, S., McMahon, S. M., & Enquist, B. J. (2016). Towards process-based  
703 range modeling of many species. *Trends in Ecology & Evolution*, 31(11), 860-871.
- 704 Evans, T. (2015). Considerations for the use of transcriptomics in identifying the 'genes that matter' for  
705 environmental adaptation. *Journal of Experimental Biology*, 218(12), 1925-1935.
- 706 Feder, M. E., & Hofmann, G. E. (1999). Heat-shock proteins, molecular chaperones, and the stress  
707 response: evolutionary and ecological physiology. *Annual Review of Physiology*, 61(1), 243-  
708 282.
- 709 Fine, P. V. (2015). Ecological and evolutionary drivers of geographic variation in species diversity.  
710 *Annual Review of Ecology, Evolution, and Systematics*, 46, 369-392.
- 711 Fusco, G., & Minelli, A. (2010). Phenotypic plasticity in development and evolution: facts and concepts.  
712 Introduction. *Philosophical Transactions of the Royal Society of London. Series B, Biological*  
713 *sciences*, 365(1540), 547-556. doi:10.1098/rstb.2009.0267

- 714 Garvin, M. R., Thorgaard, G. H., & Narum, S. R. (2015). Differential expression of genes that control  
715 respiration contribute to thermal adaptation in redband trout (*Oncorhynchus mykiss*  
716 *gairdneri*). *Genome Biology and Evolution*, 7(6), 1404-1414.
- 717 Gates, K., Sandoval-Castillo, J., Bernatchez, L., & Beheregaray, L. B. (2017). De novo transcriptome  
718 assembly and annotation for the desert rainbowfish (*Melanotaenia splendida tatei*) with  
719 comparison with candidate genes for future climates. *Marine Genomics*, 35, 63-68.
- 720 Ghalambor, C. K., Hoke, K. L., Ruell, E. W., Fischer, E. K., Reznick, D. N., & Hughes, K. A. (2015). Non-  
721 adaptive plasticity potentiates rapid adaptive evolution of gene expression in nature. *Nature*,  
722 525(7569), 372.
- 723 Ghalambor, C. K., Huey, R. B., Martin, P. R., Tewksbury, J. J., & Wang, G. (2006). Are mountain passes  
724 higher in the tropics? Janzen's hypothesis revisited. *Integrative and Comparative Biology*,  
725 46(1), 5-17. doi:10.1093/icb/icj003
- 726 Ghalambor, C. K., McKay, J. K., Carroll, S. P., & Reznick, D. N. (2007). Adaptive versus non-adaptive  
727 phenotypic plasticity and the potential for contemporary adaptation in new environments.  
728 *Functional Ecology*, 21(3), 394-407.
- 729 Gibert, P., Debat, V., & Ghalambor, C. K. (2019). Phenotypic plasticity, global change, and the speed of  
730 adaptive evolution. *Current Opinion in Insect Science*.
- 731 Gilad, Y., Oshlack, A., & Rifkin, S. A. (2006). Natural selection on gene expression. *Trends in Genetics*,  
732 22(8), 456-461.
- 733 Grabherr, G., Gottfried, M., & Pauli, H. (2009). Climate effects on mountain plants. *Nature*, 369(6480),  
734 448; 448.
- 735 Grabherr, M. G., Haas, B. J., Yassour, M., Levin, J. Z., Thompson, D. A., Amit, I., . . . Zeng, Q. (2011).  
736 Trinity: reconstructing a full-length transcriptome without a genome from RNA-Seq data.  
737 *Nature Biotechnology*, 29(7), 644.
- 738 Grenier, S., Barre, P., & Litrico, I. (2016). Phenotypic Plasticity and Selection: Nonexclusive Mechanisms  
739 of Adaptation. *Scientifica*, 2016, 7021701-7021701. doi:10.1155/2016/7021701
- 740 Haas, B. J., Papanicolaou, A., Yassour, M., Grabherr, M., Blood, P. D., Bowden, J., . . . Lieber, M. (2013).  
741 De novo transcript sequence reconstruction from RNA-seq using the Trinity platform for  
742 reference generation and analysis. *Nature Protocols*, 8(8), 1494.
- 743 He, X., & Zhang, J. (2006). Why do hubs tend to be essential in protein networks? *PLoS Genetics*, 2(6),  
744 e88.
- 745 Hodgins-Davis, A., & Townsend, J. P. (2009). Evolving gene expression: from G to E to G× E. *Trends in*  
746 *Ecology & Evolution*, 24(12), 649-658.
- 747 Hoffmann, A. A., Chown, S. L., & Clusella-Trullas, S. (2013). Upper thermal limits in terrestrial  
748 ectotherms: how constrained are they? *Functional Ecology*, 27(4), 934-949.
- 749 Hoffmann, A. A., & Sgro, C. M. (2011). Climate change and evolutionary adaptation. *Nature*, 470(7335),  
750 479-485.
- 751 IPCC. (2014). *Climate Change 2014—Impacts, Adaptation and Vulnerability: Regional Aspects*:  
752 Cambridge University Press.
- 753 Janzen, D. H. (1967). Why Mountain Passes are Higher in the Tropics. *The American Naturalist*,  
754 101(919), 233-249. doi:10.1086/282487
- 755 Jetz, W., & Fine, P. V. (2012). Global gradients in vertebrate diversity predicted by historical area-  
756 productivity dynamics and contemporary environment. *PLoS Biology*, 10(3), e1001292.
- 757 Jin, W., Riley, R. M., Wolfinger, R. D., White, K. P., Passador-Gurgel, G., & Gibson, G. (2001). The  
758 contributions of sex, genotype and age to transcriptional variance in *Drosophila melanogaster*.  
759 *Nature Genetics*, 29(4), 389.
- 760 Kearney, M., & Porter, W. (2009). Mechanistic niche modelling: combining physiological and spatial  
761 data to predict species' ranges. *Ecology Letters*, 12(4), 334-350.
- 762 Kenkel, C. D., & Matz, M. V. (2016). Gene expression plasticity as a mechanism of coral adaptation to  
763 a variable environment. *Nature Ecology and Evolution*, 1, 0014. doi:10.1038/s41559-016-0014

- 764 King, M.-C., & Wilson, A. C. (1975). Evolution at two levels in humans and chimpanzees. *Science*,  
765 188(4184), 107-116.
- 766 Kingsolver, J. G., & Buckley, L. B. (2017). Evolution of plasticity and adaptive responses to climate  
767 change along climate gradients. *Proceedings of the Royal Society B: Biological Sciences*,  
768 284(1860), 20170386.
- 769 Komoroske, L. M., Connon, R. E., Jeffries, K. M., & Fangué, N. A. (2015). Linking transcriptional  
770 responses to organismal tolerance reveals mechanisms of thermal sensitivity  
771 in a mesothermal endangered fish. *Molecular Ecology*, 24(19), 4960-4981.  
772 doi:10.1111/mec.13373
- 773 Langmead, B., & Salzberg, S. L. (2012). Fast gapped-read alignment with Bowtie 2. *Nature Methods*,  
774 9(4), 357.
- 775 Li, B., & Dewey, C. N. (2011). RSEM: accurate transcript quantification from RNA-Seq data with or  
776 without a reference genome. *BMC Bioinformatics*, 12(1), 323.
- 777 Livingstone, D. M., & Lotter, A. F. (1998). The relationship between air and water temperatures in lakes  
778 of the Swiss Plateau: a case study with palaeolimnology; limnological implications. *Journal of*  
779 *Paleolimnology*, 19(2), 181-198.
- 780 Love, M. I., Huber, W., & Anders, S. (2014). Moderated estimation of fold change and dispersion for  
781 RNA-seq data with DESeq2. *Genome Biology*, 15(12), 550.
- 782 Maestre, F. T., Salguero-Gomez, R., & Quero, J. L. (2012). It is getting hotter in here: determining and  
783 projecting the impacts of global environmental change on drylands. *Philosophical*  
784 *Transactions of the Royal Society B: Biological Sciences*, 367(1606), 3062-3075.
- 785 Magoulick, D. D., & Kobza, R. M. (2003). The role of refugia for fishes during drought: a review and  
786 synthesis. *Freshwater Biology*, 48(7), 1186-1198.
- 787 Magozzi, S., & Calosi, P. (2015). Integrating metabolic performance, thermal tolerance, and plasticity  
788 enables for more accurate predictions on species vulnerability to acute and chronic effects of  
789 global warming. *Global Change Biology*, 21(1), 181-194.
- 790 Marden, J. (2008). Quantitative and evolutionary biology of alternative splicing: how changing the mix  
791 of alternative transcripts affects phenotypic plasticity and reaction norms. *Heredity*, 100(2),  
792 111-120.
- 793 Mathewson, P. D., Moyer-Horner, L., Beever, E. A., Briscoe, N. J., Kearney, M., Yahn, J. M., & Porter,  
794 W. P. (2017). Mechanistic variables can enhance predictive models of endotherm  
795 distributions: the American pika under current, past, and future climates. *Global Change*  
796 *Biology*, 23(3), 1048-1064.
- 797 McCairns, R. J. S., Smith, S., Sasaki, M., Bernatchez, L., & Beheregaray, L. B. (2016). The adaptive  
798 potential of subtropical rainbowfish in the face of climate change: heritability and heritable  
799 plasticity for the expression of candidate genes. *Evolutionary Applications*, 9, 531-545.  
800 doi:10.1111/eva.12363
- 801 McCairns, R. S., & Bernatchez, L. (2010). Adaptive divergence between freshwater and marine  
802 sticklebacks: insights into the role of phenotypic plasticity from an integrated analysis of  
803 candidate gene expression. *Evolution: International Journal of Organic Evolution*, 64(4), 1029-  
804 1047.
- 805 McCairns, R. S., & Bernatchez, L. (2012). Plasticity and heritability of morphological variation within  
806 and between parapatric stickleback demes. *Journal of Evolutionary Biology*, 25(6), 1097-1112.
- 807 McCulloch, G. A., Oliphant, A., Dearden, P. K., Veale, A. J., Ellen, C. W., & Waters, J. M. (2019).  
808 Comparative transcriptomic analysis of a wing-dimorphic stonefly reveals candidate wing loss  
809 genes. *EvoDevo*, 10(1), 21. doi:10.1186/s13227-019-0135-4
- 810 McGuigan, K., Chenoweth, S. F., & Blows, M. W. (2005). Phenotypic divergence along lines of genetic  
811 variance. *The American Naturalist*, 165(1), 32-43.
- 812 McGuigan, K., Franklin, C. E., Moritz, C., & Blows, M. W. (2003). Adaptation of rainbow fish to lake and  
813 stream habitats. *Evolution*, 57(1), 104-118.

- 814 McGuigan, K., Zhu, D., Allen, G. R., & Moritz, C. (2000). Phylogenetic relationships and historical  
815 biogeography of melanotaeniid fishes in Australia and New Guinea. *Marine and Freshwater*  
816 *Research*, 51(7), 713-723. doi:<http://dx.doi.org/10.1071/MF99159>
- 817 Muschick, M., Barluenga, M., Salzburger, W., & Meyer, A. (2011). Adaptive phenotypic plasticity in the  
818 Midas cichlid fish pharyngeal jaw and its relevance in adaptive radiation. *BMC Evolutionary*  
819 *Biology*, 11, 116-116. doi:10.1186/1471-2148-11-116
- 820 Narum, S. R., & Campbell, N. R. (2015). Transcriptomic response to heat stress among ecologically  
821 divergent populations of redband trout. *BMC Genomics*, 16(1), 103.
- 822 Nevins, J. R., & Potti, A. (2007). Mining gene expression profiles: expression signatures as cancer  
823 phenotypes. *Nature Reviews Genetics*, 8(8), 601.
- 824 Nonaka, E., Svanbäck, R., Thibert-Plante, X., Englund, G., & Brännström, Å. (2015). Mechanisms by  
825 which phenotypic plasticity affects adaptive divergence and ecological speciation. *The*  
826 *American Naturalist*, 186(5), E126-E143. doi:doi:10.1086/683231
- 827 Nosil, P. (2012). *Ecological speciation*: Oxford University Press.
- 828 Orphanides, G., & Reinberg, D. (2002). A unified theory of gene expression. *Cell*, 108(4), 439-451.
- 829 Parmesan, C., Ryrholm, N., Stefanescu, C., Hill, J. K., Thomas, C. D., Descimon, H., . . . Tamaru, T.  
830 (1999). Poleward shifts in geographical ranges of butterfly species associated with regional  
831 warming. *Nature*, 399(6736), 579-583.
- 832 Payne, N. L., & Smith, J. A. (2017). An alternative explanation for global trends in thermal tolerance.  
833 *Ecology Letters*, 20(1), 70-77.
- 834 Pfennig, D. W., Wund, M. A., Snell-Rood, E. C., Cruickshank, T., Schlichting, C. D., & Moczek, A. P.  
835 (2010). Phenotypic plasticity's impacts on diversification and speciation. *Trends in Ecology &*  
836 *Evolution*, 25(8), 459-467.
- 837 Polato, N. R., Gill, B. A., Shah, A. A., Gray, M. M., Casner, K. L., Barthelet, A., . . . Encalada, A. C. (2018).  
838 Narrow thermal tolerance and low dispersal drive higher speciation in tropical mountains.  
839 *Proceedings of the National Academy of Sciences*, 115(49), 12471-12476.
- 840 Pritchard, J. K., & Di Rienzo, A. (2010). Adaptation—not by sweeps alone. *Nature Reviews Genetics*,  
841 11(10), 665.
- 842 Rakshit, H., Rathi, N., & Roy, D. (2014). Construction and analysis of the protein-protein interaction  
843 networks based on gene expression profiles of Parkinson's disease. *PLoS One*, 9(8), e103047.
- 844 Reed, T. E., Schindler, D. E., & Waples, R. S. (2011). Interacting effects of phenotypic plasticity and  
845 evolution on population persistence in a changing climate. *Conservation Biology*, 25(1), 56-63.
- 846 Roberge, C., Guderley, H., & Bernatchez, L. (2007). Genome-wide Identification of Genes under  
847 Directional Selection: Gene Transcription Qst Scan in Diverging Atlantic Salmon  
848 Subpopulations. *Genetics*, 177(2), 1011-1022.
- 849 Robinson, M. D., & Oshlack, A. (2010). A scaling normalization method for differential expression  
850 analysis of RNA-seq data. *Genome Biology*, 11(3), R25.
- 851 Roelofs, D., Janssens, T. K., Timmermans, M. J., Nota, B., Marien, J., Bochdanovits, Z., . . . Van Straalen,  
852 N. M. (2009). Adaptive differences in gene expression associated with heavy metal tolerance  
853 in the soil arthropod *Orchesella cincta*. *Molecular Ecology*, 18(15), 3227-3239.
- 854 Rohlf, R. V., & Nielsen, R. (2015). Phylogenetic ANOVA: the expression variance and evolution model  
855 for quantitative trait evolution. *Systematic Biology*, 64(5), 695-708.
- 856 Schadt, E. E., Monks, S. A., Drake, T. A., Lusk, A. J., Che, N., Colinayo, V., . . . Cavet, G. (2003). Genetics  
857 of gene expression surveyed in maize, mouse and man. *Nature*, 422(6929), 297.
- 858 Scheiner, S. M. (1993). Genetics and evolution of phenotypic plasticity. *Annual Review of Ecology and*  
859 *Systematics*, 24(1), 35-68.
- 860 Seddon, A. W., Macias-Fauria, M., Long, P. R., Benz, D., & Willis, K. J. (2016). Sensitivity of global  
861 terrestrial ecosystems to climate variability. *Nature*, 531(7593), 229.
- 862 Shannon, P., Markiel, A., Ozier, O., Baliga, N. S., Wang, J. T., Ramage, D., . . . Ideker, T. (2003).  
863 Cytoscape: a software environment for integrated models of biomolecular interaction  
864 networks. *Genome Research*, 13(11), 2498-2504.



- 865 Simão, F. A., Waterhouse, R. M., Ioannidis, P., Kriventseva, E. V., & Zdobnov, E. M. (2015). BUSCO:  
866 assessing genome assembly and annotation completeness with single-copy orthologs.  
867 *Bioinformatics*, *31*(19), 3210-3212.
- 868 Smith, S., Bernatchez, L., & Beheregaray, L. B. (2013). RNA-seq analysis reveals extensive  
869 transcriptional plasticity to temperature stress in a freshwater fish species. *BMC Genomics*,  
870 *14*(1). doi:10.1186/1471-2164-14-375
- 871 Somero, G. (2010). The physiology of climate change: how potentials for acclimatization and genetic  
872 adaptation will determine 'winners' and 'losers'. *Journal of Experimental Biology*, *213*(6), 912-  
873 920.
- 874 Sorte, C. J., Jones, S. J., & Miller, L. P. (2011). Geographic variation in temperature tolerance as an  
875 indicator of potential population responses to climate change. *Journal of Experimental Marine*  
876 *Biology and Ecology*, *400*(1), 209-217.
- 877 Stamatakis, A. (2014). RAxML version 8: a tool for phylogenetic analysis and post-analysis of large  
878 phylogenies. *Bioinformatics*, *30*(9), 1312-1313.
- 879 Stillman, J. H. (2003). Acclimation capacity underlies susceptibility to climate change. *Science*,  
880 *301*(5629), 65-65.
- 881 Summers, D. M., Bryan, B. A., Crossman, N. D., & Meyer, W. S. (2012). Species vulnerability to climate  
882 change: impacts on spatial conservation priorities and species representation. *Global Change*  
883 *Biology*, *18*(7), 2335-2348. doi:10.1111/j.1365-2486.2012.02700.x
- 884 Sunday, J. M., Bates, A. E., & Dulvy, N. K. (2011). Global analysis of thermal tolerance and latitude in  
885 ectotherms. *Proceedings of the Royal Society of London B: Biological Sciences*, *278*(1713),  
886 1823-1830.
- 887 Sunday, J. M., Bates, A. E., & Dulvy, N. K. (2012). Thermal tolerance and the global redistribution of  
888 animals. *Nature Climate Change*, *2*(9), 686-690.
- 889 Szklarczyk, D., Morris, J. H., Cook, H., Kuhn, M., Wyder, S., Simonovic, M., . . . Bork, P. (2016). The  
890 STRING database in 2017: quality-controlled protein-protein association networks, made  
891 broadly accessible. *Nucleic Acids Research*, *45*, D362.
- 892 Tewksbury, J. J., Huey, R. B., & Deutsch, C. A. (2008). Putting the heat on tropical animals. *Science*,  
893 *320*(5881), 1296.
- 894 Thomas, C. D., Cameron, A., Green, R. E., Bakkenes, M., Beaumont, L. J., Collingham, Y. C., . . . Hannah,  
895 L. (2004). Extinction risk from climate change. *Nature*, *427*(6970), 145-148.
- 896 Thomas, C. D., & Lennon, J. J. (1999). Birds extend their ranges northwards. *Nature*, *399*(6733), 213.
- 897 UniProt-Consortium. (2014). UniProt: a hub for protein information. *Nucleic Acids Research*, *43*(D1),  
898 D204-D212.
- 899 Unmack, P. J., Allen, G. R., & Johnson, J. B. (2013). Phylogeny and biogeography of rainbowfishes  
900 (Melanotaeniidae) from Australia and New Guinea. *Molecular Phylogenetics and Evolution*,  
901 *67*(1), 15-27. doi:10.1016/j.ympev.2012.12.019
- 902 Vale, C. G., & Brito, J. C. (2015). Desert-adapted species are vulnerable to climate change: Insights  
903 from the warmest region on Earth. *Global Ecology and Conservation*, *4*, 369-379.
- 904 Vernberg, F. J. (1959). Studies on the physiological variation between tropical and temperate zone  
905 fiddler crabs of the genus *Uca*. II. Oxygen consumption of whole organisms. *The Biological*  
906 *Bulletin*, *117*(1), 163-184.
- 907 Wellband, K. W., & Heath, D. D. (2017). Plasticity in gene transcription explains the differential  
908 performance of two invasive fish species. *Evolutionary Applications*, *10*(6), 563-576.
- 909 Whitehead, A. (2012). Comparative genomics in ecological physiology: toward a more nuanced  
910 understanding of acclimation and adaptation. *Journal of Experimental Biology*, *215*(6), 884-  
911 891.
- 912 Whitehead, A., & Crawford, D. L. (2006). Neutral and adaptive variation in gene expression.  
913 *Proceedings of the National Academy of Sciences*, *103*(14), 5425-5430.

- 914 Wiens, J. A., Stralberg, D., Jongsomjit, D., Howell, C. A., & Snyder, M. A. (2009). Niches, models, and  
915 climate change: assessing the assumptions and uncertainties. *Proceedings of the National*  
916 *Academy of Sciences*, *106*(2), 19729-19736.
- 917 Wiens, J. J. (2016). Climate-related local extinctions are already widespread among plant and animal  
918 species. *PLoS Biology*, *14*(12), e2001104.
- 919 Wund, M. A. (2012). Assessing the impacts of phenotypic plasticity on evolution. *Integrative and*  
920 *Comparative Biology*, *52*(1), 5-15. doi:10.1093/icb/ics050
- 921
